# Supplementary material for: Effects of olmesartan on renal and cardiovascular outcomes in type 2 diabetes with overt nephropathy: a multicentre, randomised, placebo-controlled study
Source: PubMed Central journal article supplement — Diabetologia. 2011 Oct 13;54(12):2978–86. doi: 10.1007/s00125-011-2325-z (PMC3210358; doi:10.1007/s00125-011-2325-z), 2011-10-13
Supplement: 125_2011_2325_MOESM1_ESM.pdf [file 125_2011_2325_MOESM1_ESM.pdf]

## **Electronic supplementary material**

### **ORIENT study personnel**

**Steering Committee:** H. Makino, S. Ito, M. Haneda, E. Imai, J. C. N. Chan.

**Representatives of Sponsor:** S. Tsukiyama, T. Inoue, T. Yamasaki

**Statistical Analysis:** F. Kobayashi

**Person in Charge of Randomization and Blinding:** C. Hamada

**Independent Statistical Review:** H. Origasa, and N. Kumagai

**Independent Data Monitoring Committee:** S. Katayama, T. Hashimoto, H. Origasa.

**Renal/Cardiovascular Endpoints Adjudication Committee:** T. Moriya, T. Babazono, K. Shikata, H. Daida, M. Takayama, N. Tanahashi, K. Kitagawa.

### **ORIENT study investigators**

**Japan:-** N. Abe, H. Amemiya, T. Asano, T. Asano, S. Eto, M. Fujii, S. Fujii, N. Fukushima, M. Haneda, T. Hayashi, K. Higashi, T. Himeno, M. Hiramatsu, K. Hirao, T. Hiyoshi, Y. Ieki, K. Iino, M. Imanishi, E. Imano, S. Imoto, H. Inariba, T. Inokuchi, M. Inoue, T. Ishihara, Y. Ishihara, K. Ishii, E. Ishimura, T. Isozaki, Y. Iwamoto, K. Kaneko, K. Kawahara, K. Kawai, K. Kikuchi, K. Kosugi, D. Koya, S. Kuniyoshi, K. Kuwahara, M. Matsumoto, K. Mikami, F. Minagawa, K. Misawa, E. Muso, T. Nakamura, I. Narita, C. Nawa, H. Nishimura, M. Nishimura, S. Nohara, M. Nomura, H. Ogata, S. Ogawa, H. Ohashi, A. Ohishi, F. Okuguchi, T. Osonoi, K. Ota, H. Otani, T. Sano, T. Sasahara, H. Seino, M. Sekiya, K. Shikata, K. Shimoda, I. Shiroma, A.

Sugawara, M. Sugimoto, T. Sugimoto, S. Sugiyama, M. Suzuki, S. Suzuki, K. Taira, Y.  
Takaesu, M. Takagi, H. Takahashi, M. Takai, E. Takazakura, H. Takizawa, H. Tanaka,  
Y. Tanizawa, T. Tao, O. Tomonaga, Y. Tsubakihara, T. Tsuchihashi, A. Tsutsumi, M.  
Uehara, N. Ura, M. Wakisaka, S. Watanabe, R. Yabe, K. Yamada, S. Yamada, S.  
Yamada, Y. Yamada, Y. Yamada, S. Yamamoto, A. Yamauchi, K. Yamazaki, H.  
Yoshida, T. Yoshida, M. Yoshinari, G. Yoshino

**Hong Kong:** - J. C. N. Chan, A. P. S. Kong, K. F. Lee, K. W. Lo, R. C. W. Ma, R.  
Ozaki, W. Y. So, P.C.Y Tong, C. Y. Yeung
