# Supplementary material for: Effects of olmesartan on renal and cardiovascular outcomes in type 2 diabetes with overt nephropathy: a multicentre, randomised, placebo-controlled study
Source: Springer Nature journal article supplement (doi:10.1007/s00125-011-2325-z), 2011-10-12
Supplement: MOESM4 [file 8090368]

## Electronic supplementary material

**ESM Table 1** Reasons for premature discontinuation of study drugs in type 2 diabetic patients with overt proteinuria and renal insufficiency randomized to receive either olmesartan or placebo for a mean follow up period of 3.2 years.

| Variable                                           | Olmesartan   | Placebo   |
|----------------------------------------------------|--------------|-----------|
|                                                    | <i>n</i> (%) |           |
| All patients (Olmesartan = 282, Placebo = 284)     |              |           |
| Total no. of discontinuation due to adverse events | 73 (25.9)    | 64 (22.5) |
| Discontinuation due to adverse events of interest  |              |           |
| Hypotension                                        | 3 (1.1)      | 0 (0.0)   |
| Syncope or dizziness                               | 0 (0.0)      | 0 (0.0)   |
| Hypoglycemia                                       | 0 (0.0)      | 0 (0.0)   |
| Anemia                                             | 2 (0.7)      | 3 (1.1)   |
| Hyperkalaemia                                      | 26 (9.2)     | 15 (5.3)  |
| Renal impairment                                   | 13 (4.6)     | 11 (3.9)  |
| Acute renal failure                                | 1 (0.4)      | 1 (0.4)   |
