# Supplementary figures and images for: Effects of olmesartan on renal and cardiovascular outcomes in type 2 diabetes with overt nephropathy: a multicentre, randomised, placebo-controlled study
Source: PubMed Central journal article supplement — Diabetologia. 2011 Oct 13;54(12):2978–86. doi: 10.1007/s00125-011-2325-z (PMC3210358; doi:10.1007/s00125-011-2325-z), 2011-10-13

**ESM Fig. 2 Mean Blood pressure (mmHg) during treatment in all patients**

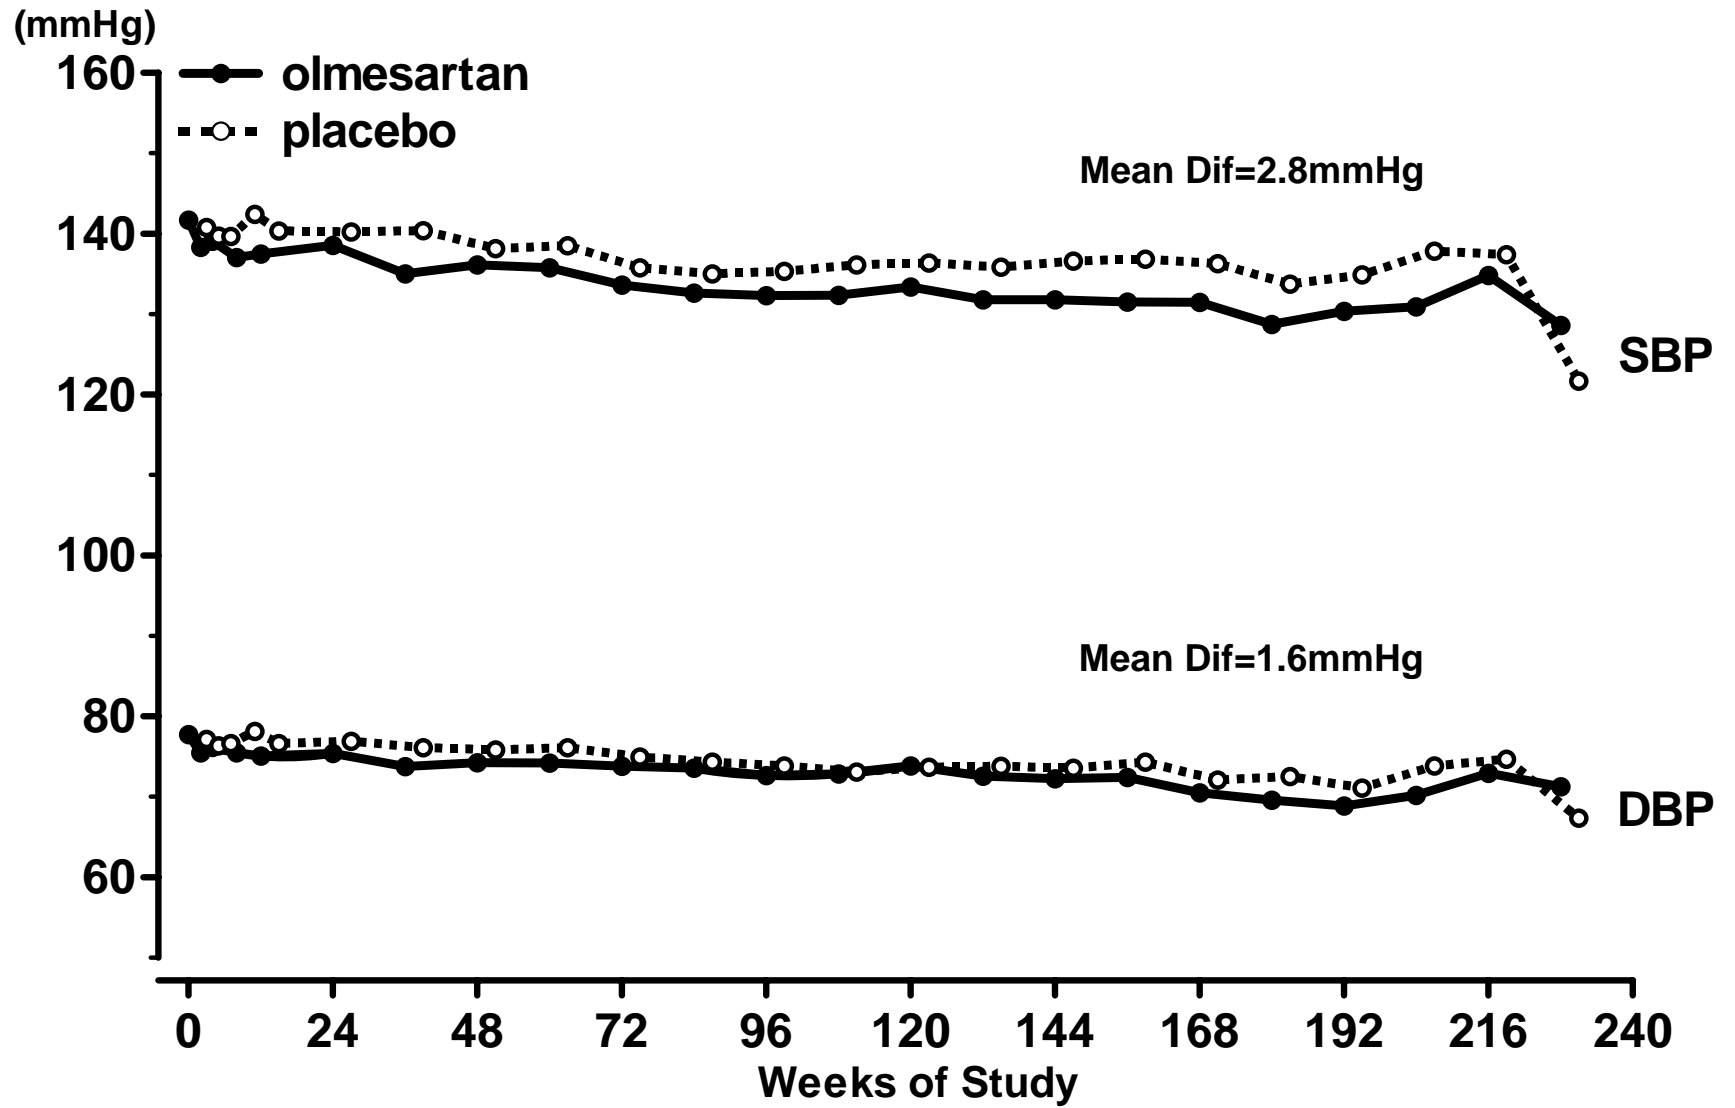

|            |     |     |     |     |     |     |     |    |    |    |
|------------|-----|-----|-----|-----|-----|-----|-----|----|----|----|
| olmesartan | 282 | 267 | 245 | 228 | 204 | 183 | 138 | 78 | 38 | 15 |
| placebo    | 284 | 274 | 245 | 220 | 190 | 169 | 131 | 75 | 31 | 15 |

Supplement: 125_2011_2325_MOESM3_ESM.pdf [file 125_2011_2325_MOESM3_ESM.pdf]
