# Supplementary figures and images for: Effects of olmesartan on renal and cardiovascular outcomes in type 2 diabetes with overt nephropathy: a multicentre, randomised, placebo-controlled study
Source: Springer Nature journal article supplement (doi:10.1007/s00125-011-2325-z), 2011-10-12

**ESM Fig. 1 Study flow diagram.**

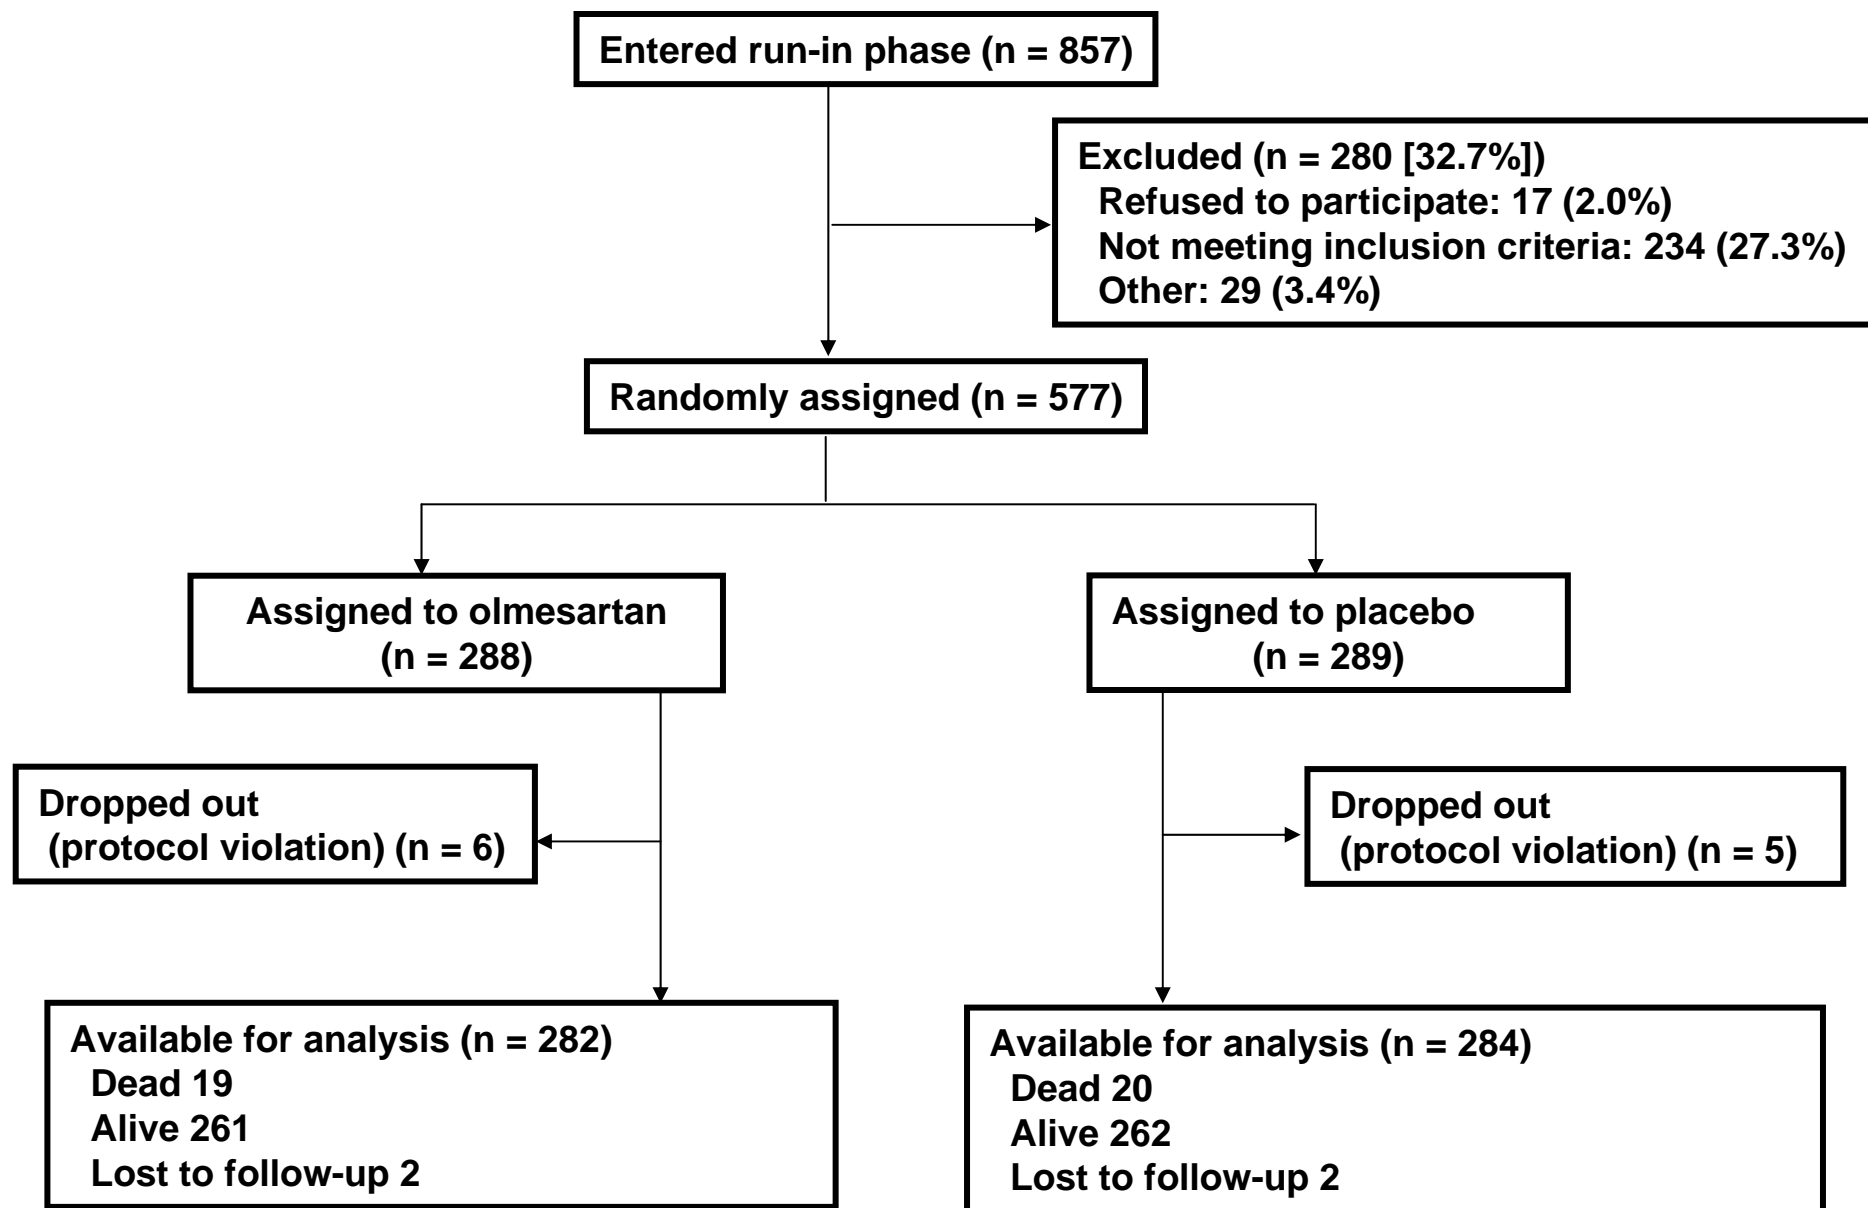

Supplement: MOESM2 [file 8090368]
